1 **Title**

2 Lasy-Seq: a high-throughput library preparation method for RNA-Seq and its application in  
3 the analysis of plant responses to fluctuating temperatures

4

5 **Author list**

6 Mari Kamitani <sup>1,2</sup>

7 Makoto Kashima <sup>1</sup>

8 Ayumi Tezuka <sup>1</sup>

9 Atsushi J. Nagano \* <sup>3</sup>

10 <sup>1</sup> Research Institute for Food and Agriculture, Ryukoku University, Yokotani, Seta Oe-cho  
11 Otsu, Shiga, Japan

12 <sup>2</sup> Center for Ecological Research, Kyoto University, Hirano, Otsu, Shiga, Japan

13 <sup>3</sup> Faculty of Agriculture, Ryukoku University, Yokotani, Seta Oe-cho Otsu, Shiga, Japan

14

15 **Corresponding author**

16 Atsushi J. Nagano

17 Email: [anagano@agr.ryukoku.ac.jp](mailto:anagano@agr.ryukoku.ac.jp)

18

19

20

21 **Abstract**

22 RNA-Seq is a whole-transcriptome analysis method used to research biological mechanisms  
23 and functions; its use in large-scale experiments is limited by costs and labour. In this study,  
24 we established a high-throughput and cost effective RNA-Seq library preparation method that  
25 did not require mRNA enrichment. The method adds unique index sequences to samples  
26 during reverse transcription (RT) that is conducted at a higher temperature ( $\geq 62^{\circ}\text{C}$ ) to  
27 suppress RT of A-rich sequences in rRNA, and then pools all samples into a single tube. Both  
28 single-read and paired end sequencing of libraries is enabled. We found that the pooled RT  
29 products contained large amounts of RNA, mainly rRNA, and caused over-estimations of the  
30 quantity of DNA, resulting in unstable tagmentation results. Degradation of RNA before  
31 tagmentation was necessary for the stable preparation of libraries. We named this protocol  
32 low-cost and easy RNA-Seq (Lasy-Seq), and used it to investigate temperature responses in  
33 *Arabidopsis thaliana*. We analysed how sub-ambient temperatures (10–30°C) affected the  
34 plant transcriptomes, using time-courses of RNA-Seq from plants grown in randomly  
35 fluctuating temperature conditions. Our results suggest that there are diverse mechanisms  
36 behind plant temperature responses at different time scales.

37

38

39 **Introduction**

40 RNA-Seq enables us to analyse transcriptomes, the comprehensive expression profile of the  
41 genome, and has been used for a variety of analyses, such as the effects of mutations <sup>1,2</sup>,  
42 stress responses <sup>3-5</sup>, chemical biosynthesis pathways <sup>6</sup> and plant-pathogen interactions <sup>7,8</sup>.  
43 However, large scale experiments have been limited due to the large costs required for library  
44 preparation and sequencing. Recently, with the rise of single cell RNA-Seq technology, an  
45 increasing number of methods for high-throughput RNA-Seq have been reported <sup>9</sup>. In  
46 conventional RNA-Seq methods, enrichment of mRNA occurs at the first step of library  
47 preparation, with oligo-dT beads or enzymatic digestion of rRNA in samples <sup>10</sup>. The  
48 preparation of a large number of libraries is cost- and labour- intensive and can result in high  
49 variance of the quality and quantity of samples. Previous studies of single cell RNA-Seq have  
50 developed a method that adds unique index sequences to each sample during the reverse  
51 transcription (RT) step, the first step of library preparation, by adding unique cell-barcodes  
52 located in Oligo-dT RT primers <sup>11,12</sup>. The index-added samples can be pooled into a tube and  
53 all remaining reactions conducted in single tube. In applying sample pooling at an early step  
54 in a library preparation, concern about false-assignment among samples has been reported <sup>13</sup>.  
55 The rate of false-assignment caused by sequencing (index-hopping) was reported to reach 2%  
56 in sequencing with sequencers with patterned flow-cell such as NextSeq, HiSeq 4000 and  
57 HiSeq X <sup>14</sup>. Although the rate was small, in sequencers with non-patterned flow cells such as  
58 MiSeq and Hiseq 2500, false-assignment could also be caused by excessive PCR  
59 amplification of the library during its preparations, at rates reported to reach 0.4% <sup>13</sup>.  
60 Reducing the steps in library preparation is expected to reduce sample loss caused by  
61 insufficient reaction or purification steps. To reduce the steps and amount of time taken for  
62 library preparation, previous studies have employed tagmentation with a Tn5 transposase <sup>15-17</sup>.  
63 Efficiency of tagmentation by transposase was reported to be largely affected by the amount

64 of input DNA, resulting in changes in the distributions of insert length <sup>9</sup>.

65 In plants, RNA-Seq has been used to analyse various environmental-responses. Plants  
66 detect environmental changes, such as ambient temperature fluctuations, with high sensitivity  
67 and subsequently alter their growth and/ or architecture <sup>18,19</sup>. For example a 10% reduction in  
68 rice yield and strong inhibition of lettuce seed germination were caused by an increase of  
69 only 1°C in ambient temperature <sup>20,21</sup>. In *Arabidopsis*, high ambient-temperatures cause  
70 spindly growth and early flowering of plants, while low ambient-temperatures repress  
71 flowering <sup>22-24</sup>. Molecular mechanisms of ambient-temperature responses are starting to be  
72 identified <sup>25,26</sup>. Furthermore, several studies have indicated that plants refer to past  
73 temperatures, such as the existence of heat shock memory <sup>27,28</sup>. Moreover, it has also been  
74 reported that sub-lethal heat stress of plants can result in acquired tolerance to subsequent  
75 higher heat stress events, known as heat acclimation. Heat stress memories are stored for  
76 longer intervals, this is different from acute tolerance known as a heat shock response <sup>29-31</sup>.  
77 Because majority of these previous studies were conducted under a few constant-temperature  
78 conditions, less is known about how long or how much plants refer past temperature.

79 In this study, we have developed a high-throughput and cost-effective RNA-Seq library  
80 preparation method with RT indexing of total-RNA samples, which let us skip the process of  
81 mRNA enrichment and pools all samples into a single tube at an early stage of library  
82 preparation. Using this method, we have revealed the ambient temperatures and durations of  
83 exposure to them, by randomly changing the growth temperatures from 10°C to 30°C every  
84 other day, that affected the transcriptomes of *A. thaliana*.

## 85 **Results**

### 86 **Optimization of RNA-Seq library preparation methods for high-throughput processing**

87 To develop a high-throughput and cost-effective RNA-Seq preparation method, we applied  
88 methods used for single cell RNA-Seq (scRNA-Seq) in previous studies. In the scRNA-Seq  
89 method, the amount of input RNA was small, therefore all samples were pooled after being  
90 indexed by an index-added primer during RT step. Furthermore, previous studies employed  
91 tagmentation with transposase (Nextera TDE1 enzyme) after the second strand synthesis <sup>32</sup>.  
92 As transposase fragmentizes dsDNA by inserting adapters, the tagmentation step can replace  
93 fragmentation, end-repair, dA-tailing and adapter ligation steps from the conventional  
94 RNA-Seq methods applied in TruSeq <sup>17</sup>. The pooling and tagmentation steps result in reduced  
95 financial costs and labour, allowing us to develop a high-throughput and cost-effective  
96 method for RNA-Seq. Initially we simply applied the method from the previous study,  
97 hereafter referred to as the small-input method (SI-method), into bulk RNA-Seq, using larger  
98 amounts of input RNA than scRNA-Seq (Fig. 1) <sup>16</sup>. However, due to several problems  
99 discussed in the proceeding, we decided to optimize the SI-method for bulk RNA-Seq thus  
100 developing a new method; method for large-input (LI-method) (Fig. 1), named low-cost and  
101 easy RNA-Seq (Lasy-Seq). Examination of Lasy-Seq was conducted using RNA from *Oryza*  
102 *sativa*.

103 We found three main difficulties in applying the SI-method to bulk RNA-Seq. First, we  
104 detected large amounts of non-poly-A reads such as rRNA in our bulk RNA-Seq data. In the  
105 SI method, we could skip the process of mRNA-enrichment and RT was conducted directly  
106 from the total RNA. We found that not only mRNA but also rRNA was transcribed from their  
107 internal A-rich regions in rRNAs (Fig. 2A). This phenomenon was also observed in previous  
108 studies <sup>33</sup>. To avoid consumption of sequence reads by rRNA, we tried to suppress RT for  
109 rRNA by increasing the RT reaction temperature. We set the RT temperature at 50°C (the

110 original temperature with Superscript IV reverse transcriptase), 56°C and 62°C. The number  
111 of reads of rRNA was drastically decreased in RT at 62°C (Fig. 2A). In addition, the amount  
112 of cDNA of non-poly-A genes other than rRNAs and poly-A genes were quantified by qPCR.  
113 The amount of cDNA from poly-A RNA was similar all temperatures, while the amount of  
114 cDNA from non-poly-A RNA was reduced (Cp value was increased) at 62°C (Fig. 2B);  
115 therefore, we concluded that RT at temperatures greater than 62°C could suppress the  
116 transcription of rRNA.

117 Second, we found that the results of tagmentation were unstable, although the same  
118 amounts of input DNA were used. The cause was determined to be RNA-carryover that was  
119 also quantified as DNA (Fig. 3), causing over estimations of the quantity of DNA. This could  
120 affect the length-distribution of the tagmentation product, as the frequency of tagmentation  
121 by transposase was determined from the stoichiometry of DNA and transposase <sup>17</sup>. This  
122 difficulty was solved by adding an RNase treatment step before quantification of DNA for the  
123 tagmentation step. We found that the RNase A (or RNase T1) reaction at 37°C for 5 min was  
124 enough to remove the RNA in our protocol. In conventional bulk RNA-Seq the problem of  
125 RNA-carryover does not occur, as the enrichment step of mRNA was included in the  
126 protocols before RT <sup>10</sup>. It may not be a problem in scRNA-Seq because the procedure uses  
127 minute quantities of input RNA and pre-amplification. The degradation step for RNA was  
128 necessary with the bulk RNA-Seq without mRNA enrichment.

129 Finally, the SI-method required paired-end sequencing, the cost of which is greater than  
130 that for single-read sequencing. At first we prepared RT primers for paired-end sequencing  
131 based on a previous study (PE78 RT-primer and PE 60 RT primer in Supplementary Fig. S1)  
132 <sup>16</sup>. After confirming that these primers worked well using *O. sativa* RNA, primers were  
133 designed for single-read sequencing of Lasy-Seq (Supplementary Fig. S1). The library  
134 constructed by the Lasy-Seq method can be sequenced by not only single-read sequencing,

135 but also by paired-read sequencing from which information of unique molecular identifiers  
136 (UMI) is available.

137

### 138 **Rate of false-assignment among the pooled samples**

139 In order to estimate the false-assignment among samples during the PCR and sequencing  
140 steps, we prepared samples with and without ERCC-controls and quantified the number of  
141 ERCC-control reads detected in samples without ERCC-control. Early-pooled sets were  
142 pooled before the library amplification step and late-pooled sets were pooled before the  
143 sequencing step. RT primers of different lengths (60 mer and 78 mer) were used and a total of  
144 eight samples were prepared (Fig. 4). The technical replicates showed high correlation with  
145 each other (Pearson's correlation coefficients of 0.986 and 0.998 for each of the two RT  
146 primer set in Fig. 4A, respectively).

147 In late-pooled samples, among randomly selected  $10^5$  reads,  $1.4 \times 10^4$  and  $1.3 \times 10^4$  reads  
148 were mapped on samples with ERCC-control for each RT primer, while 3 and 1 reads were  
149 detected in samples without ERCC-control (Fig. 4). These reads could be derived from other  
150 samples with ERCC-control sequenced together (in total  $6.0 \times 10^4$  ERCC-control reads),  
151 therefore the false-assignment rate of this lane during sequencing was 0.027%  
152 (Supplementary Fig. S2). In early-pooled samples,  $1.7 \times 10^4$  and  $1.6 \times 10^4$  reads were mapped  
153 on samples with ERCC-control. The number of reads obtained from samples without the  
154 ERCC-controls were 3 and 5, which occupied 0.031% and 0.018% of the paired-pooled  
155 samples for each RT primer (Fig. 4). These rates include the false-assignment rates caused by  
156 sequencing. Therefore, according to rough estimates, the difference between early-pooled and  
157 late-pooled samples could be regarded as the false-assignment rate during PCR. The rates of  
158 the subtractions (1 and 3 reads) against the ERCC reads in the paired samples were 0.0060%  
159 and 0.019% of the paired-pooled samples, respectively (Supplementary Fig. S2). By

160 considering these data, we regarded that false-assignments among samples were almost the  
161 same as the rates reported by previous studies (Supplementary table S3). We have concluded  
162 that the rates were at an acceptable level for both the RT primer sets when using optimal PCR  
163 cycles in the amplification of libraries.

164

### 165 **Correlation between plant transcriptomes and past temperatures**

166 We applied this method to investigate the effect of sub-ambient temperature changes on gene  
167 expression of *A. thaliana*. Analyses on the correlation between the plant transcriptome and  
168 temperatures on the sampling day or previous days were conducted. Plants were cultivated  
169 under temperatures randomly fluctuating between 10°C and 30°C each day (Fig. 5). Samples  
170 were collected every day at noon for 8 days and were analysed with Lasy-Seq. For each of  
171 the 45 samples, from  $5.8 \times 10^5$  to  $6.2 \times 10^6$  reads were obtained by sequencing. The rate of  
172 reads mapped to the reference sequences were from 93.7% to 95.8% of the total reads.  
173 Correlations were calculated between the transcriptomes and the growth temperature on the  
174 sampling day and 1, 2 and 3 days prior to sampling (Fig. 6). We confirmed that there were no  
175 correlations between temperatures on these days (Fig. 5C). The number of genes significantly  
176 correlated with each temperature were 2921, 435, 351 and 8 genes for the sampling day and 1,  
177 2 and 3 days prior to sampling, respectively (adjusted  $p < 0.1$ , correlation coefficients  $> 0.05$ ,  
178 red points in Fig. 6, Supplementary table S2). The effect of temperature on gene expression  
179 was largest on the sampling day, and then decreased with the lapse of time (Fig. 6).

180 The expression of *GIGANTEA* (*GI*) and *PHYTOCLOCK 1* (*PCLI*, synonym: *LUX*  
181 *ARRHYTHMO*, *LUX*) were negatively correlated with the temperature on sampling day (Fig.  
182 7). These two genes have been related to circadian rhythms<sup>34</sup>. The amplitudes of the  
183 circadian oscillations of *GI* and *PCLI* expression became larger with the increase of  
184 temperature, even in the ambient temperature ranges<sup>35</sup>. All samples were collected at 12:00



185 (AM) to detect snapshots of the transcriptome, so the increase of the amplitude must be  
186 interpreted as a decrease in expression in this study (Fig. 7B). Another example, expression  
187 of *LEAFY* (*LFY*) was positively correlated with the temperature on sampling day (Fig. 7).  
188 *LFY* is a floral meristem identity gene, which triggers the transition from vegetative to  
189 reproductive phases<sup>36</sup>. Similar temperature-response patterns were observed in *MYB33* and  
190 *PUCHI*, which were reported to be positive regulators of *LFY*<sup>37-39</sup>. *MYB33* mediates  
191 gibberellin (GA)-dependent activation of *LFY*<sup>37</sup>. *PUCHI*, an AP2/EREBP family gene, plays  
192 important roles in floral fate determination and bract suppression<sup>38</sup>. High correlation  
193 suggested that expression of these genes was changed by ambient temperature changes. The  
194 opposite pattern was observed for the temperature response of *embryonic flower 1* (*EMF1*)  
195 and *apetala 3* (*AP3*). The expression pattern of *EMF1* could be explained by the function of  
196 *LFY* as the repressor, reported by previous studies<sup>40,41</sup>. On the other hand, *LFY* was reported  
197 to be an activator of *AP3*<sup>36</sup>. *AP3* was reportedly involved in petal and stamen formation<sup>42</sup>.  
198 *LFY* was known to bind to *AP3* promoter sequences directly and activate *AP3* transcription  
199 with other factors<sup>43</sup>. Most of these previous experiments analysed the developmental  
200 processes of plants grown under constant temperature conditions, therefore, different  
201 gene-regulatory mechanisms might be working in the temperature response under fluctuating  
202 temperature conditions. Some genes had higher correlation to the temperatures from days  
203 prior to sampling. For example, *Calcineurin B-like protein 6* (*CBL6*), *AT hook motif*  
204 *DNA-binding family protein* (*AHL6*) and *nucleolin 2* (*NUC2*) showed significant correlations  
205 between their expression and the temperature 1 day prior to sampling (Fig. 8), while the  
206 relationships were not significant on sampling day. The expression of *CBL6* was decreased  
207 with increased temperatures the day prior to sampling (Fig. 8). *CBL6* has been reported to be  
208 involved in cold tolerance in *Stipa purpurea*<sup>44</sup>. Our results detected  
209 ambient-cold-temperature responses of this gene which might occur after relatively delays of

210 1 day. Another gene, *AHL6*, showed similar expression patterns as *CBL6* (Fig. 8), this gene is  
211 involved in regulating hypocotyl growth in seedlings<sup>45</sup>. The *NUC2* gene is one of the most  
212 abundant nucleolar proteins, plays multiple roles in the nucleolus and is involved in several  
213 steps of ribosome biogenesis. *NUC2* was also reported to be implicated in DNA replication,  
214 methylation, recombination, repair and chromatin organization of rDNA<sup>46,47</sup>. The  
215 temperature responses of *AHL6* and *NUC2* were less known, but our results suggest that their  
216 responses to ambient temperatures occur approximately one day post exposure (Fig. 8).

217 GO enrichment analysis of these temperature-responded in genes revealed genes with  
218 GO terms of “intracellular membrane-bounded organelle”, “membrane-bounded organelle”,  
219 “intracellular organelle” , “organelle”, “intracellular”, “intracellular part”, “cell” and “cell  
220 part” were significantly enriched on the sampling day. One day prior to sampling,  
221 “intracellular”, “intracellular part”, “cell” and “cell part” were enriched and no significant  
222 enrichments were detected 2 and 3 days prior to sampling. We detected only general GO  
223 terms. Genes that we observed in this study may be responding to mild changes in  
224 temperature that would not trigger stress-responses.

225

## 226 **Discussion**

227 In this study, we developed a high-throughput RNA-Seq method by simplifying the  
228 experimental procedures. By pooling samples after the RT step, Lasy-Seq reduced cost and  
229 time compared with those required with previously used methods<sup>48</sup>. We prepared 192  
230 RT-primers with unique index sequences which enabled sequencing to be conducted in one  
231 lane (Supplementary note 1). To pool the more than 192 samples, 2<sup>nd</sup> index sequences can be  
232 added to the libraries by inserting 2<sup>nd</sup> index sequences into reverse PCR primers, between P5  
233 and Nextera adapter sequences (Supplementary Fig. S1, C). The false assignment rates  
234 associated with sample-pooling and caused by pooled-PCR and sequencing were like those  
235 reported in previous studies (Supplementary table S3). The false-assignment rates will be  
236 affected by the number of PCR cycles; over amplification of libraries is expected to cause  
237 higher false-assignment rates. Optimizing PCR cycles is thus necessary for suppressing  
238 false-assignment among samples. False-assignment means false detection of reads in a  
239 sample from another samples. Considering the false-assignment rates observed in this study  
240 (maximum 0.031%), differences in gene expression of larger than approximately 3,000-fold  
241 theoretically cannot be detected, because 0.031% of reads from other samples were  
242 falsely-assigned. In other words, if 10,000 reads were detected for a gene in a sample, 3.1  
243 reads for the same gene are expected to be falsely-assigned in the other samples sequenced in  
244 the same lane. False-assignment cause limitations of dynamic range. For example, the  
245 detectable difference of gene expression between samples becomes less than 3225-fold  
246 (10,000/3.1). Usually this limit of sensitivity is enough to analyse gene expression changes in  
247 the same tissues or plants. However, this sensitivity might be problem in determination of  
248 infection by plant viruses, which can produce large amount of reads which exceeds the  
249 amount of host total mRNA ) in infected samples, and no reads in un-infected samples<sup>8</sup>.  
250 Furthermore, in Lasy-Seq, degradation of RNA-carryover was essential for precise

251 quantification of DNA. Even after RNase treatment, we observed libraries with different  
252 length distributions were produced from the same input DNA as from different plant species  
253 (data not shown). Therefore, we have recommended to include the optimization step of the  
254 input amount for tagmentation. The reason why the length of libraries was different among  
255 sample from different species is that GC content of genome or intrinsic-inhibitors of  
256 tagmentation may be affecting the reaction.

257 We applied Lasy-Seq to *A. thaliana* to analyse the temperature responses to validate this  
258 method, and successfully detected thousands of genes responding to the temperature  
259 fluctuations examined in this study. Previous studies reported that phenotypes of mutants can  
260 be changed by ambient temperatures. For example in *LFY*, phenotypes of the *lfy-5* mutants  
261 became enhanced at 16°C compared with 25°C<sup>49</sup>. In our study expression of *LFY* and its  
262 upstream activators, *MYB33* and *PUCHI*, were positively correlated with the temperature on  
263 sampling day and relatively low at lower temperature conditions. Therefore, the low  
264 expression levels of *LFY* may result from the low expression levels of these activators,  
265 caused by low temperature. To examine responses in gene expression under various  
266 temperature-conditions is important to understand plant environmental adaptations. For  
267 instance, in our study, genes which responded to temperatures experienced prior to sampling  
268 day were also identified by conducting time-course analysis of plants grown under  
269 fluctuating-temperature conditions. The correlation between gene expression and past  
270 temperatures detected in this study suggests various mechanisms of plant temperature  
271 responses with different time scales.

272 Large-scale transcriptome analysis has recently started and provided new insights into  
273 various topics. A previous study analysed transcriptomes of 1,203 samples from 998  
274 accessions of *A. thaliana*, and methylomes of 1,107 samples from 1,028 accessions<sup>50</sup>.  
275 Between relict and non-relict accessions, 5,725 differently-expressed genes were determined.

276 Relationships between epialleles and gene expression was analysed and geographic origins  
277 were found to be major predictors of altered gene expression caused by the epialleles.  
278 Another study conducted transcriptome analyses on 1,785 samples from 7 tissues of 299  
279 maize lines <sup>51</sup>. They revealed effects of rare genetic alleles on high variance in gene  
280 expressions and correlated the variance to fitness <sup>51</sup>. Their results provided a new insight into  
281 evolutionary bottleneck during domestications. In another previous study on plants in natural  
282 environments, transcriptome analysis from weekly-samples for 2 years and bihourly-diurnal  
283 samples on the four equinoxes/solstices of *A. halleri* (873 samples) was conducted <sup>35</sup>. They  
284 identified 2,879 and 7,185 seasonally-and diurnally-oscillating genes, respectively. By  
285 shifting the phase of oscillations between temperature and day length, they found that fitness  
286 became highest in phase-combinations of natural conditions compared with un-natural  
287 conditions. Their results revealed environmental cues that plants actually used for their  
288 adaptation to seasonal changes. These studies are cutting edge in this field, and Lasy-Seq will  
289 accelerate and generalize large-scale analyses across diverse research topics.

290

291 **Methods**

292 **Culture conditions of *Oryza sativa* and *Arabidopsis thaliana***

293 *Oryza sativa* L. *japonica* ‘Nipponbare’ was grown for use in the development of our  
294 RNA-Seq library preparation method; seeds were sown in germination boxes and  
295 approximately one month after germination, fully expanded leaf blades were collected. The  
296 leaf samples were immediately frozen by liquid nitrogen and stored at -80 °C until RNA  
297 extraction.

298 *Arabidopsis thaliana* (Col-0, CS70000) was grown for the analysis of temperature  
299 responses. Seeds of *A. thaliana* were sown on 1/2 Murashige and Skoog medium with 0.5%  
300 gellan gum, incubated for 7 days at 4 °C in the dark, then cultivated for 10 days at 20 °C  
301 under 12 hr light / 8 hr dark cycles and a relative humidity of 60%. For the following 11 days,  
302 the temperature of the incubator was changed every day, following the designed temperature  
303 sets (see Fig. 5 and Results section). Three temperature sets were designed by random  
304 sampling from even-numbered temperatures between 10 - 30 °C using a sample function in R  
305 3.4.3 software<sup>52</sup>. Two replicates of 2 or 3 plant individuals were sampled at 12:00 from the  
306 3rd to 11th day after starting the temperature change (14th to 21st day after sowing). In total  
307 45 samples were collected (Supplementary table S1, see also Fig. 4). Whole plant individuals  
308 were collected, immediately frozen by liquid nitrogen and stored at -80 °C until RNA  
309 extraction.

310

311 **RNA extraction**

312 Samples were ground with zirconia beads (YTZ-4, AS-ONE, Japan), using the TissueLyser II  
313 (QIAGEN, MD, USA) with the pre-chilled adapters at -80 °C. Total RNA was extracted by  
314 Maxwell 16 LEV Plant RNA Kit (Promega, WI, USA) according to the manufacturer’s  
315 instructions. The amount of RNA was determined using Quant-iT RNA Assay Kit broad

316 range (Thermo Fisher Scientific, MA, USA) and Tecan plate reader Infinite 200 PRO (Tecan,  
317 Switzerland). The quality was assessed using a Bioanalyzer with Agilent RNA 6000 nano Kit  
318 (Agilent Technologies, CA, USA). RNA (5 µg and 500 ng) per sample was used for the  
319 library preparations of *O. sativa* and *A. thaliana*, respectively.

320

### 321 **RNA-Seq library preparation**

322 Reverse transcription (RT) of total RNA was performed with oligo-dT primers including  
323 index sequences to add a unique index to each sample (RT-indexing, Fig. 1). The RT-indexing  
324 primers for single-read sequencing (SR RT-primer in Supplementary Fig. S1.) were designed  
325 by modifying RT-primers for paired-end sequencing from a previous study<sup>16</sup>. RT reactions of  
326 the total RNA were conducted with 5.0 µL of RNA in nuclease-free water, 1 µL of 2 µM RT  
327 primer, 0.4 µL of 25 mM dNTP (Thermo Fisher Scientific, USA), 4.0 µL of 5X SSIV Buffer  
328 (Thermo Fisher Scientific), 2.0 µL of 100 mM DTT (Thermo Fisher Scientific), 0.1 µL of  
329 SuperScript IV reverse transcriptase (200 U/µL, Thermo Fisher Scientific), 0.5 µL of RNasin  
330 Plus (Ribonuclease Inhibitor, Promega) and nuclease-free water (7.0 µL) to make up the  
331 volume to 20 µL. Reverse transcription was carried out at 62°C for 50 min (or 65°C for 10  
332 min for more severe suppression of RT of rRNA), then incubated at 80°C for 15 min to  
333 inactivate the enzyme. All indexed samples were then pooled and purified with the same  
334 volume of AMPure XP beads (Beckman Coulter, USA) or column purification with Zymo  
335 spin column I (Zymo Research) and Membrane Binding Solution (Promega). If the number of  
336 samples was large, pooling of the RT products could be conducted by centrifuging the  
337 reaction plate set on a one well reservoir as described in a previous study<sup>15</sup>. The purified  
338 cDNA was dissolved in 10 µL (depending on number of pooled-samples) of nuclease-free  
339 water.

340 Second strand synthesis was conducted on the pooled samples (10 µL) with 2 µL of 10X

341 blue buffer (enzymatics, USA), 1  $\mu$ L of 2.5 mM dNTP (Takara Bio, Japan), 0.5  $\mu$ L of 100  
342 mM DTT, 0.5  $\mu$ L of RNaseH (5 U/ $\mu$ L, enzymatics), 1.0  $\mu$ L of DNA polymerase I (10 U/ $\mu$ L,  
343 enzymatics) and nuclease-free water (5  $\mu$ L) to make up the volume to 20  $\mu$ L. Reactions were  
344 conducted at 16 °C for 2 hours and kept at 4°C until the next reaction. To avoid the carryover  
345 of large amounts of RNA, RNase T1 treatments were conducted on the double-stranded DNA  
346 with 1  $\mu$ L of RNase T1 (more than 1 U/ $\mu$ L, Thermo Fisher Scientific, MA, UK). The reaction  
347 was conducted at 37°C for 30 min, 95°C for 10 min, gradual-decreases in temperature from  
348 95°C to 45°C (-0.1 °C/s), 25°C for 30 min and 4°C until the next reaction. Alternatively,  
349 reactions of 37°C for 5 min with mixtures of RNaseA (10  $\mu$ g/mL) and RNaseT (1 U/ $\mu$ L) were  
350 enough to remove RNA in the samples. The DNA was purified with 20  $\mu$ L AMPure XP beads  
351 and eluted with 10  $\mu$ L nuclease free water. Alternatively, for many samples, the AMPure bead  
352 purification could be replaced by column purification using a Zymo spin column I (Zymo  
353 Research) and Membrane Binding Solution (Promega). The DNA was then quantified by  
354 QuantiFluor dsDNA System and Quantus Fluorometer (Promega).

355 Tagmentation by transposases was conducted on the purified DNA, using 5  $\mu$ L Nextera  
356 TD buffer and 0.5  $\mu$ L TDE1 enzyme (Nextera DNA Sample Preparation kit, Illumina). The  
357 optimization of the amount of input DNA (usually between 3 ng and 8 ng) should be  
358 conducted for each pooled-sample to construct libraries with an average length of 500 bp; 4  
359 ng, 6 ng, and 8 ng were tested here. Because in libraries with shorter size distribution,  
360 sequencing-reads were reached to poly-A sequences at the 3' end of the insert, which were  
361 not informative for quantification of gene expression. Library distributions from 200 bp to  
362 1500 bp with an average length of 500 bp efficiently avoid to read poly-A sequences.  
363 Reactions were carried out at 55 °C for 5 min, then stopped by adding 12  $\mu$ L DNA binding  
364 buffer in DNA clean & concentrator kit (Zymo Research). The tagmented library was  
365 immediately purified using a Zymo spin column II (Zymo Research) following the



366 manufacturer's instructions. This purification with Zymo spin column II cannot be replaced by  
367 purification with AMPure XP beads or NucleoSpin Gel and PCR Clean-up (Takara Bio), in which  
368 final yield of the library was largely decreased.

369 To determine an optimal number of cycles for the amplification, 2  $\mu$ L of the tagmented  
370 DNA was amplified using KAPA Real-time Library Amplification Kit (KAPA), conducted  
371 with 2  $\mu$ L of the RNA with 5  $\mu$ L of 2x KAPA HiFi HotStart Real-time PCR Master Mix, 0.5  
372  $\mu$ L of 10  $\mu$ M PCR forward-primer, 0.5  $\mu$ L of 10  $\mu$ M PCR reverse-primer (Supplementary Fig.  
373 S1) and 2  $\mu$ L of water to make it up to 10  $\mu$ L. Reactions were carried out at 95°C for 5 min,  
374 30 cycles of 98°C for 20 sec, 60°C for 15 sec, 72°C for 40 sec, followed by 72°C for 3 min,  
375 then held at 4 °C. Samples (10  $\mu$ L) of standards were analysed together and optimal cycles  
376 were determined following the manufacturer's instruction.

377 The optimized PCR cycles were used for the amplification of the library with 2  $\mu$ L of the  
378 tagmented DNA. Sufficient quantity and diversity of libraries for sequencing was achieved  
379 with 2 or 3 replicates of PCR that were pooled after the amplification. The libraries were  
380 purified twice with the same volume of AMPure XP beads and dissolved in 20  $\mu$ L of  
381 nuclease-free water. Quantification of the library was conducted using QuantiFluor dsDNA  
382 System and Quantus Fluorometer (Promega). The size distribution of the libraries were  
383 analysed by the Bioanalyzer with high sensitivity DNA kits (Agilent Technologies, CA,  
384 USA) and optimal input amount of DNA were determined. Tagmentation reactions with the  
385 optimized input amounts of DNA were conducted in triplicate to reduce PCR cycles in library  
386 amplification. The tagmented DNA was eluted in 15  $\mu$ L of nuclease-free water. All three  
387 reaction solutions were pooled after the purification.

388 To construct libraries for paired-end sequencing, the required modifications were as  
389 follows. Reverse transcription should be carried out with the RT-indexing primers for  
390 paired-end sequencing (Supplementary Fig. S1). Library amplification was carried out with

391 primers for paired-end sequencing libraries (Supplementary Fig. S1). Temperatures for PCR  
392 reactions were same as described above. The protocol with detailed notes is summarised in  
393 Supplemental note 1.

394

### 395 **Sequencing**

396 Libraries of *O. sativa* for development of the RNA-Seq library preparation method were  
397 constructed with the protocol for paired-end sequencing described above. The libraries were  
398 sequenced by PE 75 sequencing with MiSeq with MiSeq Reagent Kit v3 (150 cycles,  
399 Illumina). Libraries of *A. thaliana* for analysis of temperature responses were prepared with  
400 the protocol for single-read sequencing. Single-read 50 bases and index sequencing were  
401 conducted for the libraries using HiSeq 2500 (Illumina) with the TruSeq SBS kit v3 platform  
402 conducted by Macrogen Japan Co. For sequencing of libraries prepared by the methods  
403 described in this study, we recommend the use of the Illumina platform with non-patterned  
404 flow cell such as HiSeq 2500 or MiSeq sequencer (Illumina). The concentration of the  
405 libraries produced with Lasy-Seq were sometimes over-estimated, smaller inputs of libraries  
406 than the manufacture recommends can improve results.

407

### 408 **Mapping and quantification of short-read sequences**

409 Details of the pre-processing, mapping and quantification processes were described  
410 previously (Supplementary Fig. S3) <sup>8</sup>. FASTQ files from RNA-Seq were pre-processed by  
411 removing adapter sequences and low-quality bases using trimmomatic-0.32 as described in  
412 previous works <sup>8,53</sup>. The reference transcriptome sequences of *A. thaliana* and *O. sativa* were  
413 prepared from the Arabidopsis Information Portal (Araport 11) and The Rice Annotation  
414 Project database <sup>54,55</sup>. In addition, External RNA Controls Consortium spike-in control  
415 (ERCC-control) sequences (92 genes, Thermo Fisher Scientific) were also used as reference

416 sequences. The pre-processed sequences were mapped on each reference and quantified using  
417 RSEM-1.2.15 as described in previous work <sup>8,56</sup>. We subtracted 0.05% of the total reads to  
418 avoid false assignment caused by the Illumina platforms analyser as described in a previous  
419 study <sup>8</sup>. This subtraction was not conducted for the analysis on false-assignment rates shown  
420 in Fig. 4.

421

### 422 **Analysis of false-assignment rates among pooled samples**

423 To estimate the false-assignment rates, which may be caused by early pooling of libraries, we  
424 prepared 5 µg of *O. sativa* RNA samples with and without 40 ng ERCC-control. We prepared  
425 in total 8 RNA samples from *O. sativa*. Four of them were reverse transcribed with PE60  
426 RT-primer (60 mer primer sets in Supplementary Fig. S1) and the other four were reverse  
427 transcribed with PE78 RT-primer (78 mer primer sets in Supplementary Fig. S1) for  
428 paired-end sequencing (Fig. 4 and Supplementary Fig. S1). For each primer set, samples with  
429 and without ERCC-control were pooled before amplification (early-pooled sets) and  
430 sequencing (late-pooled sets) to estimate the false-assignment rate caused by PCR and  
431 sequencing (Fig. 4). Until the pooling steps, samples were separately prepared and all 8  
432 samples were pooled before sequencing. After sequencing, the number of ERCC-control  
433 reads in each sample were determined as described above.

434 Uniquely mapped reads with a mapping quality value of  $\geq 4$  were generated using  
435 samtools and  $5.0 \times 10^5$  reads were used for the following analysis. The rates of  
436 false-assignment caused by pooled-PCR or sequencing steps were calculated from the  
437 numbers of ERCC-control reads in samples with and without ERCC-control (Supplementary  
438 Fig. S2). Briefly, ERCC reads detected in the late-pooled samples (without ERCC addition)  
439 were regarded as false-assignments caused by sequencing of each sample. Therefore, the rate  
440 of total false-assignment reads in all eight samples against total ERCC reads in the lane was

441 estimated to be the false-assignment rate caused by sequencing (Supplementary Fig. S2). The  
442 false-assignment rate caused by pooled-PCR was estimated from the ERCC-reads number  
443 detected in early-pooled samples (without ERCC addition), as explained in Supplementary  
444 Fig. S2.

445

#### 446 **Estimate deviation between technical replicates in Lasy-Seq**

447 Correlation coefficient between the early-pooled samples were calculated using rpm except  
448 for ERCC-controls to estimate deviation between technical replicates. Pearson's correlation  
449 coefficient was calculated with cor function in R version 3.5.0<sup>52</sup>.

450

#### 451 **Analysis of temperature response in *A. thaliana***

452 Samples with fewer than  $10^5$  reads and genes on which fewer than 1 read were mapped on  
453 average were excluded from the analysis. For the remaining genes (26,082 genes in 45  
454 samples), single regression analyses were conducted on gene expression (number of  
455 normalized-reads, rpm) and temperatures for each day; sampling day, 1 day before the  
456 sampling day (pre-1 day), 2 days before the sampling day (pre-2 day) and 3 days before the  
457 sampling day (pre-3 day). Correlations were tested with lm function in R. Multiple testing  
458 corrections were performed by setting the False Discovery Rate (FDR) using the p.adjust  
459 function with BH (FDR) method in R<sup>57</sup>. Genes with adjusted-*p* value of less than 0.1 were  
460 thought to have significant correlation to each temperature. Gene Ontology annotations were  
461 obtained from The Arabidopsis Information Resource (TAIR) 10<sup>58</sup>. Existence of significant  
462 enrichment of particular GO terms were tested (Fisher's exact test). Multiple testing  
463 corrections were performed by p.adjust functions with BH (FDR) method in R.

464

## 465 References

- 466 1 Xu, B. *et al*. Knockdown of STAYGREEN in perennial ryegrass (*Lolium perenne* L.) leads  
467 to transcriptomic alterations related to suppressed leaf senescence and improved forage  
468 quality. *Plant & cell physiology*, doi:10.1093/pcp/pcy203 (2018).
- 469 2 Wang, T. *et al*. Impairment of FtsHi5 function affects cellular redox balance and  
470 photorespiratory metabolism in Arabidopsis. *Plant & cell physiology*,  
471 doi:10.1093/pcp/pcy174 (2018).
- 472 3 Lin, C. W. *et al*. Common Stress Transcriptome Analysis Reveals Functional and Genomic  
473 Architecture Differences Between Early and Delayed Response Genes. *Plant & cell*  
474 *physiology* **58**, 546-559.
- 475 4 Moustafa, K. & Cross, J. M. Genetic Approaches to Study Plant Responses to  
476 Environmental Stresses: An Overview. *Biology* **5** (2): 20 (2016).
- 477 5 Sun, H. *et al*. The JASMONATE ZIM-Domain Gene Family Mediates JA Signaling and  
478 Stress Response in Cotton. *Plant & cell physiology* **58**, 2139-2154 (2017).
- 479 6 Lin, Y. *et al*. Comparative Transcriptome Profiling Analysis of Red- and White-Fleshed  
480 Strawberry (*Fragaria x ananassa*) Provides New Insight into the Regulation of  
481 Anthocyanins Pathway. *Plant & cell physiology*, doi:10.1093/pcp/pcy098 (2018).
- 482 7 Wang, M. *et al*. Plant primary metabolism regulated by nitrogen contributes to  
483 plant-pathogen interactions. *Plant & cell physiology*, doi:10.1093/pcp/pcy211 (2018).
- 484 8 Kamitani, M., Nagano, A. J., Honjo, M. N. & Kudoh, H. RNA-Seq reveals virus-virus and  
485 virus-plant interactions in nature. *FEMS microbiology ecology* **92** (11)  
486 doi:10.1093/femsec/fiw176 (2016).
- 487 9 Hrdlickova, R., Toloue, M. & Tian, B. RNA-Seq methods for transcriptome analysis. *Wiley*  
488 *Interdisciplinary Reviews: RNA* **8**, e1364, doi:doi:10.1002/wrna.1364 (2017).
- 489 10 Adiconis, X. *et al*. Comparative analysis of RNA sequencing methods for degraded or  
490 low-input samples. *Nat Methods* **10**, 623-629 (2013).
- 491 11 Hashimshony, T. *et al*. CEL-Seq2: sensitive highly-multiplexed single-cell RNA-Seq.  
492 *Genome Biology* **17**, 77, doi:10.1186/s13059-016-0938-8 (2016).
- 493 12 Islam, S. *et al*. Characterization of the single-cell transcriptional landscape by highly  
494 multiplex RNA-seq. *Genome research* (2011).
- 495 13 Kircher, M., Sawyer, S. & Meyer, M. Double indexing overcomes inaccuracies in multiplex  
496 sequencing on the Illumina platform. *Nucleic Acids Res* **40**, e3, doi:10.1093/nar/gkr771  
497 (2012).
- 498 14 Illumina Inc. Effects of Index Misassignment on Multiplexing and Downstream Analysis.  
499 (2017).
- 500 15 Sasagawa, Y. *et al*. Quartz-Seq2: a high-throughput single-cell RNA-sequencing method  
501 that effectively uses limited sequence reads. *Genome Biol* **19**, 29,  
502 doi:10.1186/s13059-018-1407-3 (2018).
- 503 16 Cao, J. *et al*. Comprehensive single-cell transcriptional profiling of a multicellular  
504 organism. *Science* **357**, 661-667 (2017).
- 505 17 Gertz, J. *et al*. Transposase mediated construction of RNA-seq libraries. *Genome Res* **22**,  
506 134-141 (2012).
- 507 18 Quint, M. *et al*. Molecular and genetic control of plant thermomorphogenesis. *Nat. plants*  
508 **2**, 10.1038 (2016).
- 509 19 Ibanez, C. *et al*. Ambient temperature and genotype differentially affect developmental  
510 and phenotypic plasticity in Arabidopsis thaliana. *BMC plant biology* **17**, 114,  
511 doi:10.1186/s12870-017-1068-5 (2017).
- 512 20 Peng, S. *et al*. Rice yields decline with higher night temperature from global warming.  
513 *Proceedings of the National academy of Sciences of the United States of America* **101**,  
514 9971-9975 (2004).
- 515 21 Argyris, J. *et al*. Quantitative trait loci associated with seed and seedling traits in *Lactuca*.  
516 *Theoretical and Applied Genetics* **111**, 1365-1376 (2005).
- 517 22 Gray, W. M., Östin, A., Sandberg, G., Romano, C. P. & Estelle, M. High temperature  
518 promotes auxin-mediated hypocotyl elongation in Arabidopsis. *Proceedings of the*  
519 *National Academy of Sciences* **95**, 7197-7202 (1998).
- 520 23 Kumar, S. V. *et al*. Transcription factor PIF4 controls the thermosensory activation of

- 521 flowering. *Nature* **484**, 242-245 (2012).
- 522 24 Lee, J. H. *et al.* Regulation of temperature-responsive flowering by MADS-box  
523 transcription factor repressors. *Science* **342**, 628-632 (2013).
- 524 25 Wigge, P. A. Ambient temperature signalling in plants. *Curr Opin Plant Biol* **16**, 661-666  
525 (2013).
- 526 26 Samach, A. & Wigge, P. A. Ambient temperature perception in plants. *Curr Opin Plant*  
527 *Biol* **8**, 483-486 (2005).
- 528 27 Stief, A. *et al.* Arabidopsis miR156 Regulates Tolerance to Recurring Environmental  
529 Stress through SPL Transcription Factors. *The Plant Cell* **26**, 1792-1807,  
530 doi:10.1105/tpc.114.123851 (2014).
- 531 28 Mittler, R., Finka, A. & Goloubinoff, P. How do plants feel the heat? *Trends in biochemical*  
532 *sciences* **37**, 118-125 (2012).
- 533 29 Charng, Y., Liu, H., Liu, N., Hsu, F. & Ko, S. Arabidopsis Hsa32, a novel heat shock  
534 protein, is essential for acquired thermotolerance during long recovery after acclimation.  
535 *Plant Physiology* **140**, 1297-1305 (2006).
- 536 30 Liu, J., Feng, L., Li, J. & He, Z. Genetic and epigenetic control of plant heat responses.  
537 *Frontiers in Plant Science* **6**, 267, doi:10.3389/fpls.2015.00267 (2015).
- 538 31 Bruce, T. J., Matthes, M. C., Napier, J. A. & Pickett, J. A. Stressful “memories” of plants:  
539 evidence and possible mechanisms. *Plant Science* **173**, 603-608 (2007).
- 540 32 Cao, J. *et al.* Comprehensive single-cell transcriptional profiling of a multicellular  
541 organism. *Science* **357**, 661-667 (2017).
- 542 33 Nam, D. K. *et al.* Oligo(dT) primer generates a high frequency of truncated cDNAs  
543 through internal poly(A) priming during reverse transcription. *Proc Natl Acad Sci USA*  
544 **99**, 6152-6156 (2002).
- 545 34 Onai, K. & Ishiura, M. PHYTOCLOCK 1 encoding a novel GARP protein essential for the  
546 Arabidopsis circadian clock. *Genes to Cells* **10**, 963-972 (2005).
- 547 35 Nagano, A. J. *et al.* Annual transcriptome dynamics in natural environments reveals  
548 plant seasonal adaptation. *Nature plants* (in press).
- 549 36 Reeves, P. H. & Coupland, G. Response of plant development to environment: control of  
550 flowering by daylength and temperature. *Current opinion in plant biology* **3**, 37-42 (2000).
- 551 37 Gocal, G. F. W. *et al.* GAMYB-like Genes, Flowering, and Gibberellin Signaling in  
552 Arabidopsis. *Plant Physiology* **127**, 1682-1693 (2001).
- 553 38 Karim, M. R., Hirota, A., Kwiatkowska, D., Tasaka, M. & Aida, M. A role for Arabidopsis  
554 PUCHI in floral meristem identity and bract suppression. *The Plant Cell* **21**, 1360-1372  
555 (2009).
- 556 39 Davis, S. J. Integrating hormones into the floral-transition pathway of Arabidopsis  
557 thaliana. *Plant, Cell & Environment* **32**, 1201-1210 (2009).
- 558 40 Chen, L., Cheng, J. C., Castle, L. & Sung, Z. R. EMF genes regulate Arabidopsis  
559 inflorescence development. *The Plant Cell* **9**, 2011-2024 (1997).
- 560 41 Espinosa-Soto, C., Padilla-Longoria, P. & Alvarez-Buylla, E. R. A Gene Regulatory  
561 Network Model for Cell-Fate Determination during *Arabidopsis thaliana* Flower  
562 Development That Is Robust and Recovers Experimental Gene Expression Profiles. *The*  
563 *Plant Cell* **16**, 2923-2939 (2004).
- 564 42 Weigel, D. & Meyerowitz, E. M. Activation of floral homeotic genes in Arabidopsis. *Science*  
565 **261**, 1723-1726 (1993).
- 566 43 Lamb, R. S., Hill, T. A., Tan, Q. K.-G. & Irish, V. F. Regulation of APETALA3 floral  
567 homeotic gene expression by meristem identity genes. *Development* **129**, 2079-2086  
568 (2002).
- 569 44 Zhou, Y. *et al.* Overexpression of SpCBL6, a calcineurin B-like protein of *Stipa purpurea*,  
570 enhanced cold tolerance and reduced drought tolerance in transgenic Arabidopsis.  
571 *Molecular biology reports* **43**, 957-966 (2016).
- 572 45 Zhao, J., Favero, D. S., Peng, H. & Neff, M. M. Arabidopsis thaliana AHL family  
573 modulates hypocotyl growth redundantly by interacting with each other via the  
574 PPC/DUF296 domain. *Proceedings of the National Academy of Sciences* **110**, E4688-E4697  
575 (2013).
- 576 46 Tuteja, R. & Tuteja, N. Nucleolin: a multifunctional major nucleolar phosphoprotein.

- 577 *Critical reviews in biochemistry and molecular biology* **33**, 407-436 (1998).  
578 47 Durut, N. *et al.* A duplicated NUCLEOLIN gene with antagonistic activity is required for  
579 chromatin organization of silent 45S rDNA in Arabidopsis. *Plant Cell* **26**, 1330-1344  
580 (2014).  
581 48 Wang, L. *et al.* A low-cost library construction protocol and data analysis pipeline for  
582 Illumina-based strand-specific multiplex RNA-seq. *PLoS One* **6**, e26426,  
583 doi:10.1371/journal.pone.0026426 (2011).  
584 49 Weigel, D., Alvarez, J., Smyth, D. R., Yanofsky, M. F. & Meyerowitz, E. M. LEAFY controls  
585 floral meristem identity in Arabidopsis. *Cell* **69**, 843-859 (1992).  
586 50 Kawakatsu, T. *et al.* Epigenomic Diversity in a Global Collection of Arabidopsis thaliana  
587 Accessions. *Cell* **166**, 492-505 (2016).  
588 51 Kremling, K. A. G. *et al.* Dysregulation of expression correlates with rare-allele burden  
589 and fitness loss in maize. *Nature* **555**, 520 (2018).  
590 52 R Core Team. R: A Language and Environment for Statistical Computing. (2017).  
591 53 Bolger, A. M., Lohse, M. & Usadel, B. Trimmomatic: a flexible trimmer for Illumina  
592 sequence data. *Bioinformatics* **30**, 2114-2120 (2014).  
593 54 Sakai, H. *et al.* Rice Annotation Project Database (RAP-DB): an integrative and  
594 interactive database for rice genomics. *Plant & cell physiology* **54**, e6,  
595 doi:10.1093/pcp/pcs183 (2013).  
596 55 Cheng, C.-Y. *et al.* Araport11: a complete reannotation of the Arabidopsis thaliana  
597 reference genome. *The Plant Journal* **89**, 789-804 (2017).  
598 56 Li, B. & Dewey, C. N. RSEM: accurate transcript quantification from RNA-Seq data with  
599 or without a reference genome. *BMC bioinformatics* **12**, 323, doi:10.1186/1471-2105-12-323  
600 (2011).  
601 57 Benjamini, Y. & Hochberg, Y. Controlling the False Discovery Rate: A Practical and  
602 Powerful Approach to Multiple Testing. *Journal of the Royal Statistical Society. Series B*  
603 *(Methodological)* **57**, 289-300 (1995).  
604 58 Berardini, T. Z. *et al.* The Arabidopsis information resource: Making and mining the "gold  
605 standard" annotated reference plant genome. *Genesis* **53**, 474-485 (2015).  
606  
607

608 **Acknowledgements**

609 We thank N. Yamaguchi for his comment on temperature response in *A. thaliana*. We also  
610 thank M. Mihara, H. Ooshima, K. Iwayama, Y. Kurita, Y. Hashida and F. Kobayashi for their  
611 support on data analysis and material preparations. This work was supported by JSPP  
612 KAKENHI Grant Numbers 16H06171, JP16H01473, JST CREST Grant Number  
613 JPMJCR1502 and JST ACCEL Grant Number JPMJAC1403 to AJN.

614

615 **Author contribution**

616 M. Kamitani and A.J.N designed the research. M. Kamitani M. Kashima and A.T. conducted  
617 the laboratory experiment. M. Kamitani, M. Kashima and A.J.N. conducted the data analysis.  
618 M. Kamitani wrote the manuscript. All authors discussed the results and approved the  
619 manuscript.

620

621 **Competing interests**

622 The authors declare that they have no conflict of interest.

623

624 **Data availability**

625 Sequence data from RNA-Seq were deposited in Sequence Read Archive (SRA). The  
626 accession numbers are PRJNA508267 (*O. sativa* and *A. thaliana*).

627

628 **List of Supplementary Information**

629 Supplementary note 1 The protocol of Lasy-Seq with detailed notes

630 Supplementary Fig. S1 Primers used in the present study.

631 Supplementary Fig. S2 Method for calculation of false-assignment rates

632 Supplementary Fig. S3 Overview of the analysis of RNA-Seq data

633 Supplementary table S1 Information on the samples collected in this study ( $n = 45$ )



634 Supplementary table S2 List of genes significantly correlated to temperature on each day  
635 Supplementary table S3 Summary of the false-assignment rates reported by previous studies  
636  
637 **Figures and Figure legends**

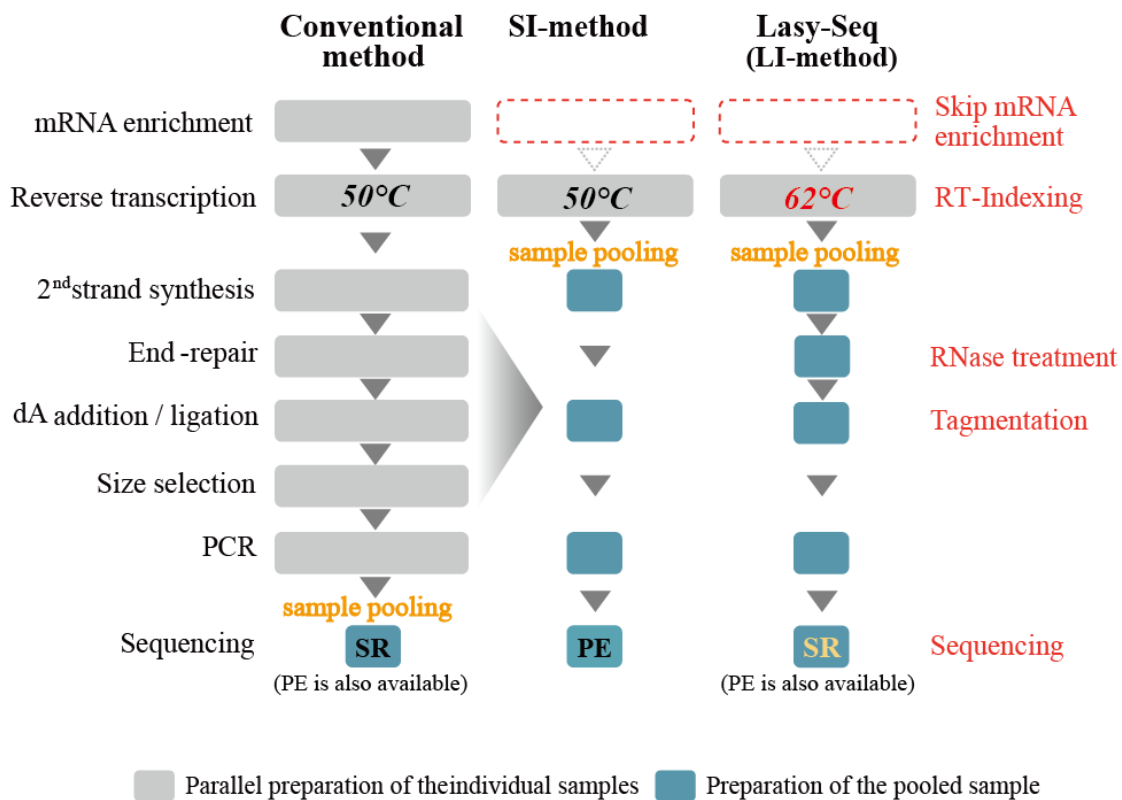

638

639

### 640 **Figure 1 Comparison of the RNA-Seq library preparation methods**

641 Steps modified in Lasy-Seq are shown on the right with red characters. In the conventional  
642 method (left), the high-throughput RNA-Seq required parallel preparation of all individual  
643 samples throughout all experimental steps. In Lasy-Seq, enrichment of mRNA was not  
644 required, and all samples were pooled into a single tube after the RT step, by adding unique  
645 index sequencing to each sample at the RT step. SI and LI indicate small-input and  
646 large-input total RNA, respectively. SR and PE indicate single-read sequencing and  
647 paired-end sequencing, respectively.

648

649

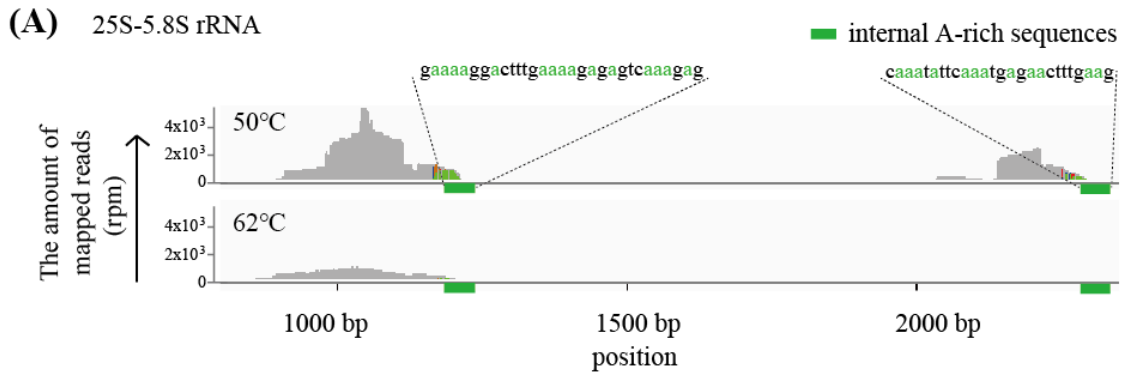

**(B)**

| gene                                                                                      | Poly-A tail | gene ID                   | $\Delta C_p^{(a)}$<br>(56°C-50°C) | $\Delta C_p^{(a)}$<br>(62°C-50°C) | Forward primer<br>(qPCR) | Reverse primer<br>(qPCR) |
|-------------------------------------------------------------------------------------------|-------------|---------------------------|-----------------------------------|-----------------------------------|--------------------------|--------------------------|
| actin2<br>(act2)                                                                          | +           | Os03g0836000              | 0.32                              | -0.16                             | GTGTGTCGGTAC<br>TTTCGTCG | TCTCAAACAAC<br>GAGCTTGG  |
| RNA polymerase II<br>transcription factor<br>SIII, subunit A domain<br>containing protein | +           | Os08g0169600              | -0.29                             | -0.16                             | GCCGTTTCAGAG<br>CAATAGGC | CACAAGCAAGGC<br>GAACTCTG |
| 60S ribosomal protein L2                                                                  | -           | RM02_ORYSJ <sup>(b)</sup> | 0.69                              | 3.27                              | CAAAGCGCTGT<br>TTGATGAG  | TCCGAAAAGACC<br>AGCTAAGC |
| photosystem II protein<br>D1 (PRD1)                                                       | -           | Osp1g00110                | 0.65                              | 2.53                              | ATTCGTGAGCCT<br>GTTTCTGG | AGATGCAGCTTC<br>CCAAATTG |

(a) Delta Cp value determined by qPCR with LightCycler 480 system II

(b) Genbank accession No.

650

651

652 **Figure 2 High temperatures suppress RT of non-poly-A RNA**

653 (A) Comparison of the distribution of the reads mapped on 25S-5.8S rRNA reverse  
 654 transcribed at 50 °C and 62 °C. RT of non-poly-A tailed RNAs were observed from internal  
 655 A-rich regions. RT at higher temperature suppressed the RT from internal A-rich regions of  
 656 non-poly-A tailed RNA. (B) List of the delta-Cp values in RT-qPCR on genes with and  
 657 without poly-A tails.

658

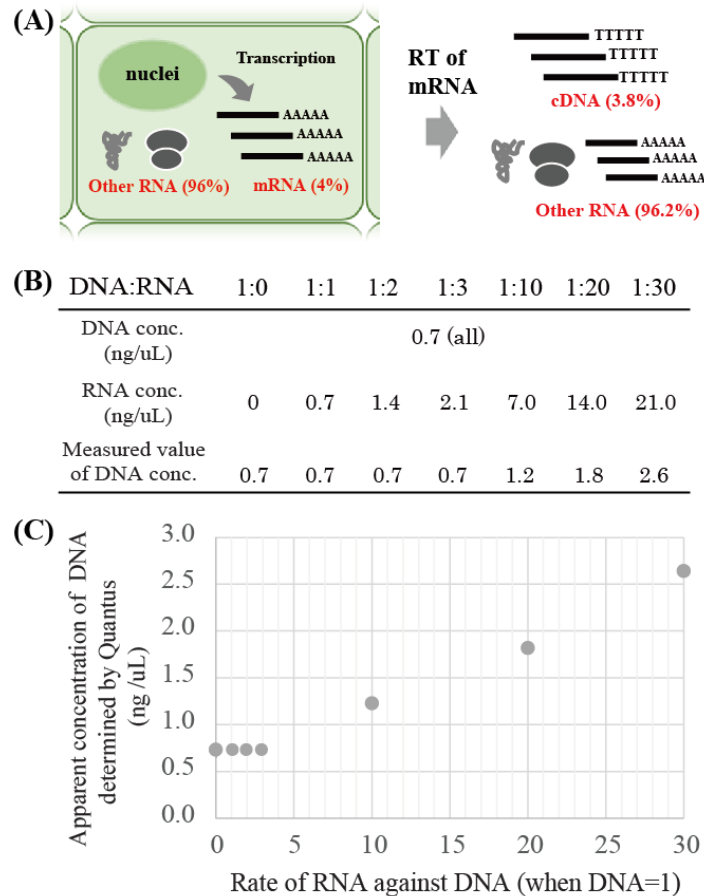

659

660

661 **Figure 3 Effect of RNA additions on DNA quantification**

662 (A) The amount of RNA in reaction solutions after RT. If mRNA occupied 4% of the total  
 663 amount of RNA in a cell, the rate RNA remained after RT of total RNA became 25 times  
 664 larger than cDNA. (B) Effect of RNA on the measurement of DNA concentrations.

665 Concentrations of DNA were determined for samples with constant amounts of DNA (0.7 ng)  
 666 and different amounts of RNA (from 0 to 30 times larger than the DNA quantity). DNA  
 667 concentration was over-estimated in RNA-added samples which contained RNA  
 668 concentrations more than 10 times larger those of DNA. In the table, “DNA conc.” and “RNA  
 669 conc.” indicate true concentration of measured liquids. “Measured value of DNA conc.”

670 means the concentration determined by QuantiFluor dsDNA System and Quantus

671 Fluorometer. (C) The plotted concentrations and DNA:RNA rates.

672

673

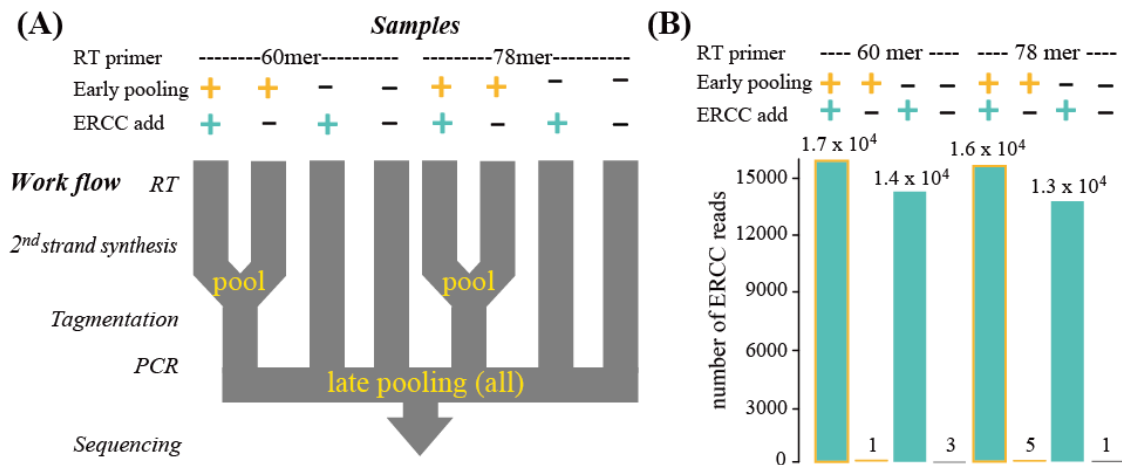

674

675

676 **Figure 4 Evaluation of the false-assignment rates associated with sample pooling at**  
 677 **early stages**

678 **(A)** Flow of the library preparation for evaluation of false-assignment rates among samples.  
 679 Early-pooled sets were pooled before the tagmentation step, while late-pooled sets were  
 680 individually prepared until purification after PCR. All samples were pooled prior to  
 681 sequencing.

682 **(B)** Number of ERCC reads detected in each sample. Numbers shown above the bar-plot  
 683 indicate the read number of ERCC. Conditions of the experiment for each sample were  
 684 shown by the colours of the bar and indicated over the bar-plot.

685

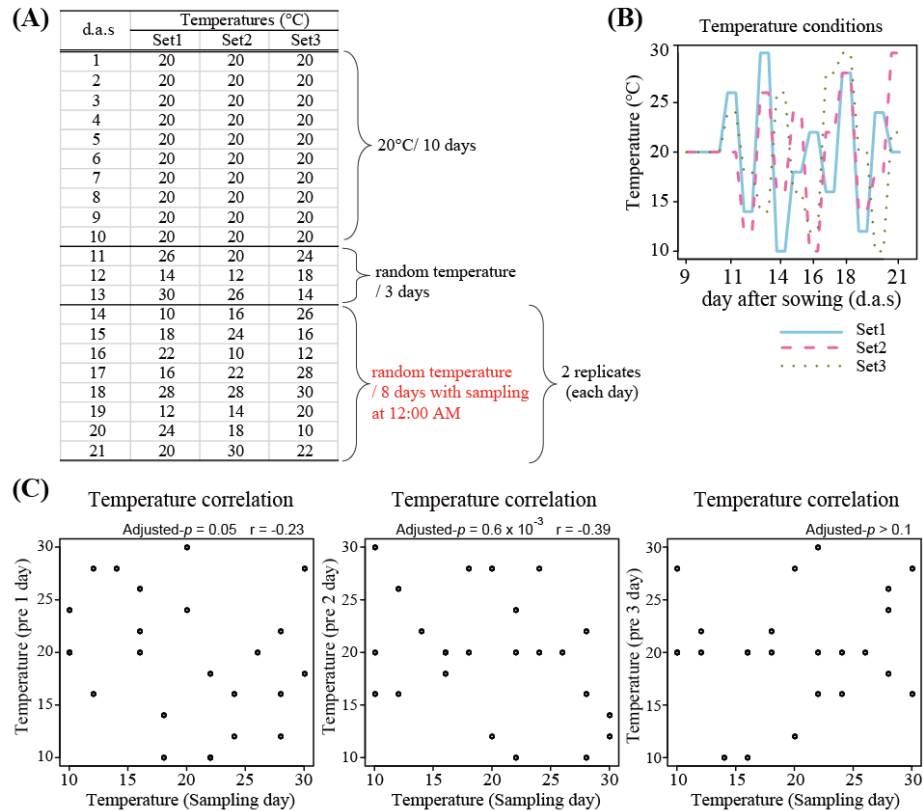

686

687

688 **Figure 5 Temperature settings in the temperature response experiment**

689 (A) The three sets of temperature conditions. Plants were grown at 20°C for 8 days and then  
 690 at changing temperature conditions for 3 days. Sampling was conducted from 14 to 21 day  
 691 after sowing (d.a.s.), indicated by red characters. (B) Diagram of the temperatures of the three  
 692 sets from 8 d.a.s to 21 d.a.s. (C) Correlation of the temperature between sampling day and the  
 693 days prior to sampling. Horizontal axis shows temperature (°C) on the sampling day and  
 694 vertical axis indicates the temperatures 1,2 and 3 days prior to sampling (from left to right,  
 695 respectively). The “Adjusted-*p*” indicated adjusted p-value (FDR) and “*r*” indicated Pearson’s  
 696 correlation coefficients.

697

698

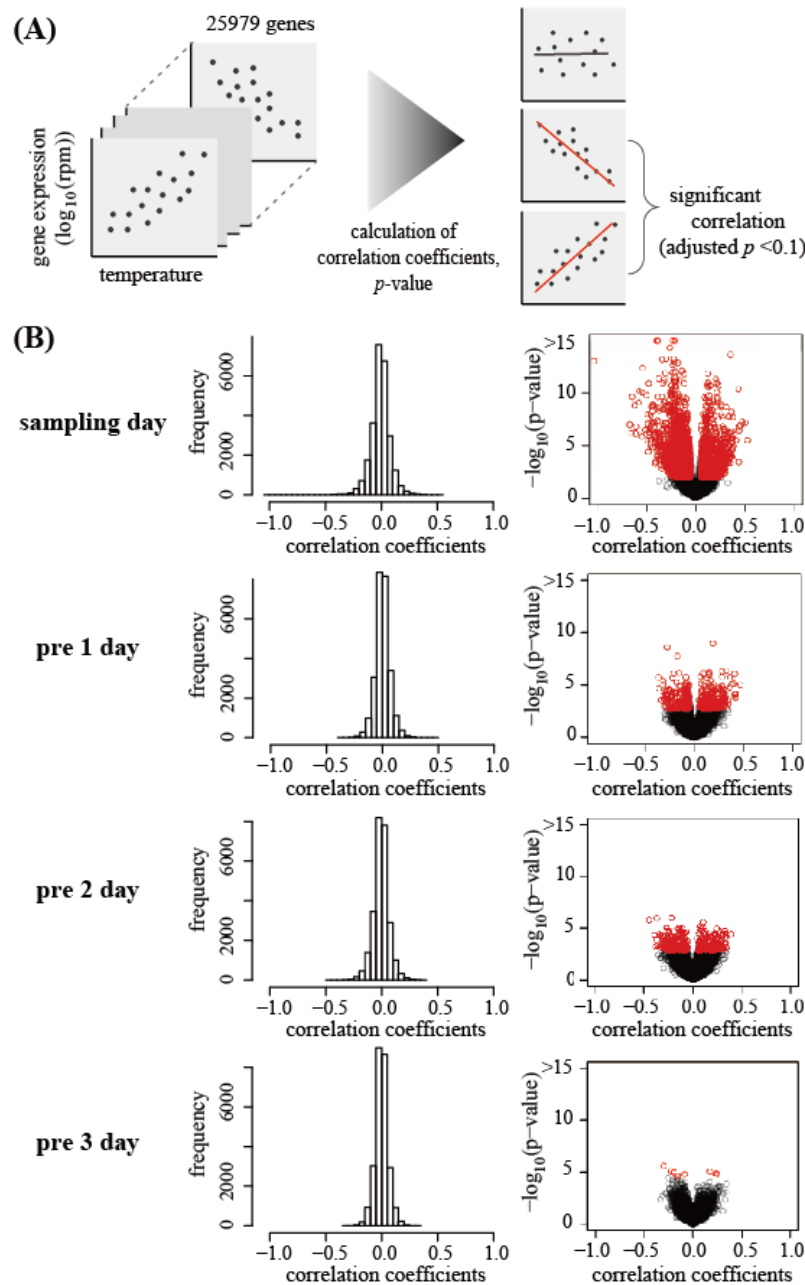

699

700 **Figure 6 The correlation between the transcriptome and the temperature.**

701 **(A)** Flow of the analysis of the correlation between gene expressions and temperatures. **(B)**

702 Distribution of the correlation coefficients for each gene between gene expression levels and

703 the temperature of the sampling day and 1,2 and 3 day prior to sampling (from top panel to

704 bottom panel, respectively). Each circle indicates each gene. Red and orange circles indicate

705 genes for which significant relationships between the expression and the temperature

706 (adjusted  $p < 0.1$ ) were detected. Red circles represent genes with correlation

707 coefficients of more than 0.05.

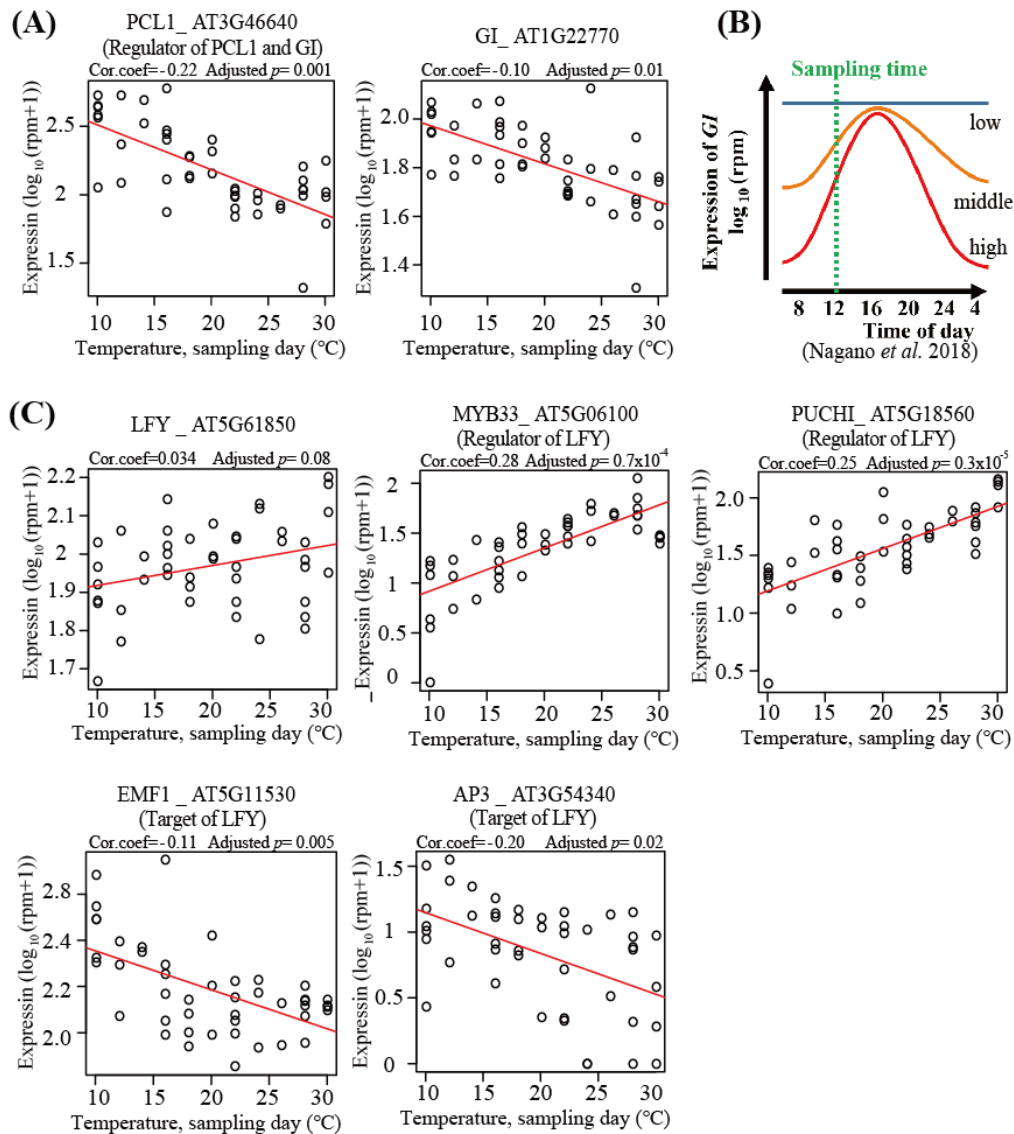

708

709 **Figure 7 Genes correlated to temperature on sampling day.**

710 (A) Expression of *PCL1* and *GI* genes. The horizontal axis indicates temperature settings for  
 711 each sample on sampling day. The vertical axis indicates expression of each gene by  $\log_{10}$   
 712 (rpm+1). Each circle indicates each sample ( $n = 45$ ) and the red lines are regression lines.  
 713 “Cor.coef” indicates correlation coefficients. (B) Schematic diagram of the changes in  
 714 amplitudes of the circadian oscillations of *GI* correlated to temperature changes reported in a  
 715 previous study. The lines with “high”, “middle” and “low” represent the circadian oscillations  
 716 of *GI* under each temperature condition (Nagano *et al.* 2018). A green broken line indicates  
 717 sampling times in the present study and expression of *GI* at the time became smaller at higher  
 718 temperatures. (C) Expression of *LFY* and the regulator or target genes of *LFY*. Horizontal axis  
 719 and vertical axis are same as (A).

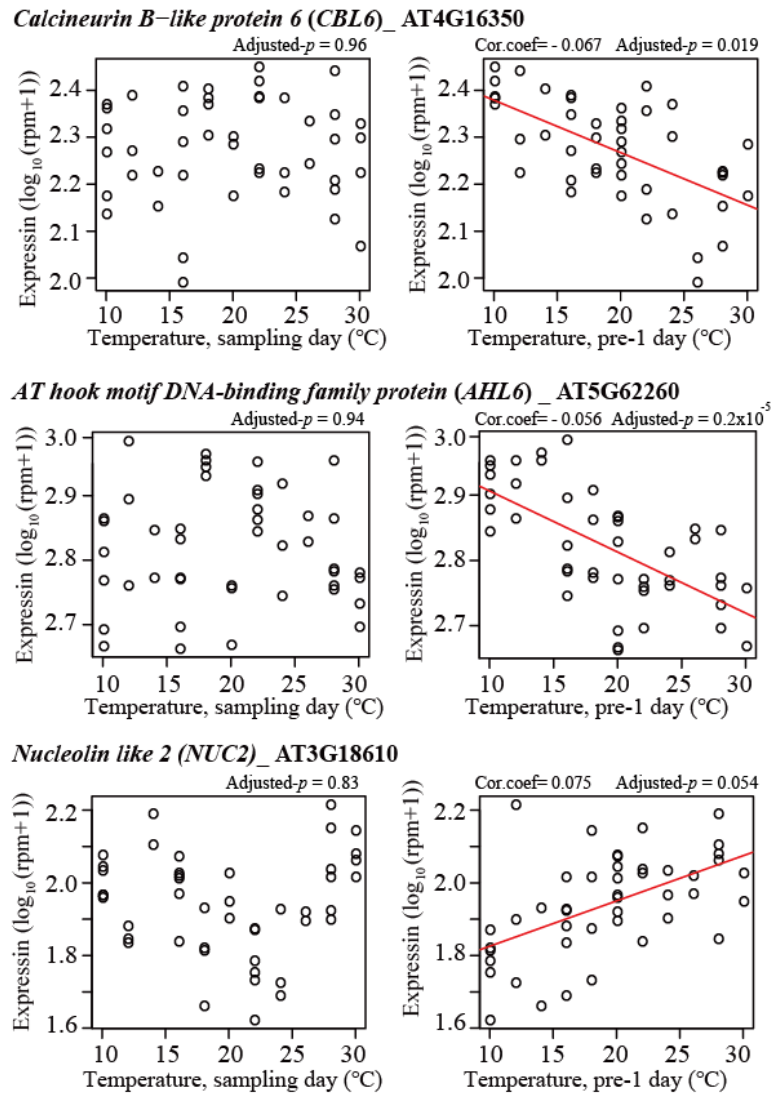

720

721

722 **Figure 8 Genes that responded to temperatures one day prior to sampling**

723 Expression levels of *CBL6* (top panel), *FPGS1* (middle panel), and *NUC2* (bottom panel)  
724 were plotted. The horizontal axis indicates temperature settings for each sample on each  
725 sampling day (left three panels) and one day prior to sampling (right three panels). The  
726 vertical axis means show expression for each gene by  $\log_{10}(\text{rpm}+1)$ . Each circle indicates  
727 each sample ( $n = 45$ ) and red lines are regression lines (drawn only in case of adjusted  
728  $p$ -value  $< 0.1$ ).

729

730
